# Supplementary material for: Highly Variable Chloroplast Markers for Evaluating Plant Phylogeny at Low Taxonomic Levels and for DNA Barcoding
Source: PLoS One. 2012 Apr 12;7(4):e35071. doi: 10.1371/journal.pone.0035071 (PMC3325284; doi:10.1371/journal.pone.0035071)
Supplement: Table S3 — Twenty-four loci of high potentials. The values are nucleotide diversity per site (π). (XLS) [file pone.0035071.s003.xls]

## Sheet: Sheet1
编号		start	end	基因组中的位置		gene name	基因
1	15Nicotiana	61264	62164	61013	61912	accD,accD-psaI	accD-psaI	3
	3Calycanthus	59845	60810	59564	60537	accD,psaI
	10Paeonia	59924	60775	59328	60178	accD-psaI
	10Paeonia	14683	15340	14547	15202	atpH-atpI	atpH-atpI	3
	16Solanum	14336	15140	14095	14900	atpH-atpI
	8Eucalyptus	14978	16081	14968	16070	atpH-atpI
	2Aethionema	1565	2222	1502	2158	matK	trnK全长	9
	7Gossypium	214	1320	214	1320	matK
	8Eucalyptus	2159	3508	2157	3506	matK
	3Calycanthus	2856	4006	2851	4001	matK,matK-trnK
	15Nicotiana	3841	5225	3833	5190	matK-rps16
	16Solanum	3460	4597	3400	4499	matK-trnK
	4Chimonanthus	1605	2854	1605	2854	trnK-matK
	14Populus	1507	2473	1507	2463	trnK-matK,matK
	2Aethionema	120474	121749	119598	120858	ndhA	ndhA	3
	8Eucalyptus	126397	127551	126209	127363	ndhA
	10Paeonia	120383	121186	119332	120135	ndhA(intron)
	10Paeonia	52008	52894	51519	52400	ndhC-trnV	ndhC-trnV	5
	13Oryza	49683	50836	49577	50729	ndhC-trnV
	14Populus	50638	51736	50020	51081	ndhC-trnV
	15Nicotiana	52916	54127	52683	53886	ndhC-trnV
	2Aethionema	50077	51198	49618	50730	ndhC-trnV
	10Paeonia	111169	112124	110153	111102	ndhF	ndhF(前一K)	5
	14Populus	113244	114163	112247	113146	ndhF
	15Nicotiana	112820	113700	112468	113348	ndhF
	2Aethionema	110440	111239	109666	111465	ndhF
	4Chimonanthus	110247	111570	110089	111369	ndhF
	9Oenothera	121443	122721	117097	118307	ndhF,ndhF-rpl32	rpl32-trnL	8
	10Paeonia	113025	114301	112003	113271	ndhF-trnL
	14Populus	115364	116044	114347	115026	ndhF-trnL
	15Nicotiana	114920	116694	114568	116342	ndhF-trnL
	16Solanum	114385	116438	113595	115623	ndhF-trnL
	2Aethionema	112690	114635	111916	113778	ndhF-trnL,rpl32
	4Chimonanthus	113723	114876	113521	114672	rpl32-trnL
	3Calycanthus	113869	115123	113475	114729	rpl32-trnL
	3Calycanthus	64116	65068	63819	64771	petA,petA-psbJ	petA-psbJ	8
	10Paeonia	64247	65127	63576	64378	petA-psbJ
	15Nicotiana	65589	66618	65424	66365	petA-psbJ
	2Aethionema	62396	63584	61757	62926	petA-psbJ
	8Eucalyptus	67461	68611	67298	68448	petA-psbJ
	13Oryza	72708	73813	72571	73674	petB-petD	petD	3
	15Nicotiana	78974	80123	78681	79830	petB-petD
	2Aethionema
	10Paeonia	29498	30354	29317	30170	petN-psbM	petN-psbM	3
	16Solanum	29933	30747	29645	30447	petN-psbM
	3Calycanthus	29695	30844	29662	30811	petN-psbM,psbM
	4Chimonanthus	36233	37395	36209	37364	psbC-trnG	trnS-trnG	6
	15Nicotiana	36601	37768	36432	37594	psbC-trnS
	3Calycanthus	36078	37827	36005	37754	psbC-trnS,trnS-trnG
	13Oryza	12230	13088	12159	13013	psbZ-trnfM
	14Populus	36029	37306	35555	36771	psbZ-trnG
	8Eucalyptus	39380	40819	39337	40750	psbZ-trnG
	2Aethionema	64336	65775	63677	65105	psbE-petG,petL	psbE-petL	3
	10Paeonia	65679	66856	64929	66106	psbE-petL
	15Nicotiana	67609	68452	67344	68187	psbE-petL
	10Paeonia	30761	31915	30577	31605	psbM-trnD	psbM-trnD	3
	2Aethionema	29006	29913	28786	29660	psbM-trnD
	14Populus	29689	30985	29375	30527	psbM-trnY
	15Nicotiana	59858	60563	59608	60312	rbcL-accD	rbcL-accD	3
	16Solanum	58421	59236	57953	58754	rbcL-accD
	7Gossypium	60523	61484	60362	61318	rbcL-accD
	14Populus	82827	83974	81907	83048	rpl16	rpl16	3
	2Aethionema	81283	82460	80558	81725	rpl16
	10Paeonia	83361	84687	82530	83834	rpl16-rps3
	1Acorus	24686	25085	24359	24756	rpoB	rpoB-trnC	4
	8Eucalyptus	27695	28645	27682	28631	rpoB
	14Populus	25949	27002	25756	26756	rpoB-trnC
	15Nicotiana	27607	28706	27492	28591	rpoB-trnC
	9Oenothera	78591	79983	75180	76534	rps12,clpP	chpP	3
	16Solanum	72165	73584	71532	72948	rps12-chpP
	13Oryza	67499	68651	67365	68515	rps12-clpP
	15Nicotiana	5326	6127	5391	6091	rps16	rps16-trnQ	6
	3Calycanthus	5515	6514	5505	6504	rps16,rps16-trnQ
	10Paeonia	6357	7354	6285	7277	rps16-trnQ
	4Chimonanthus	6121	7038	6119	7080	rps16-trnQ
	15Nicotiana	6278	7647	6242	7585	rps16-trnQ,trnQ-psbK
	2Aethionema	6884	7646	6362	7555	trnQ-psbK
	14Populus	1	756	1	756	trnH,trnH-psbA	trnH-psbA	5
	10Paeonia	1	739	1	713	trnH-psbA
	15Nicotiana	1	882	1	880	trnH-psbA
	16Solanum	1	848	1	799	trnH-psbA
	3Calycanthus	55	1254	51	1250	trnH-psbA,psbA
	14Populus	6650	7889	6572	7756	trnS-trnG	trnS-trnG	3
	15Nicotiana	8809	10020	8738	9940	trnS-trnG
	4Chimonanthus	8491	9640	8488	9637	trnS-trnG
	1Acorus	32138	32988	31809	32659	trnT-psbD	trnT-psbD	3
	3Calycanthus	32564	33605	32519	33560	trnT-psbD
	8Eucalyptus	35163	36078	35120	36035	trnT-psbD
	10Paeonia	124598	126700	123544	125646	ycf1	ycf1a
	14Populus	127725	128674	126547	127496	ycf1		9
	15Nicotiana	126971	128600	126607	128236	ycf1
	16Solanum	127742	130441	126906	129605	ycf1
	2Aethionema	124357	125989	123455	125063	ycf1
	3Calycanthus	125780	126879	125379	126478	ycf1
	4Chimonanthus	124459	125359	124330	125130	ycf1
	8Eucalyptus	132773	134473	132565	134265	ycf1
	9Oenothera	137558	139353	132882	134635	ycf1
	15Nicotiana	129763	131312	129387	130936	ycf1	ycf1b	5
	2Aethionema	126790	128710	125864	127763	ycf1
	3Calycanthus	126780	129479	126379	129078	ycf1
	4Chimonanthus	126960	127959	126731	127730	ycf1
	9Oenothera	140104	141795	135386	136836	ycf1
	16Solanum	68740	69541	68133	68937	trnW-psaJ	trnW-psaJ	3
	13Oryza	64196	65345	64065	65214	trnW-psaJ,trnP
	Nicotiana

## Sheet: Sheet2
	1	2	3	4	5	6	7	8	9	10	11	12
	Acorus	Aethionema	Calycanthus	Chimonanthus	Eucalyptus	Gossypium	Nicotiana	Oenothera	Oryza	Paeonia	Populus	Solanum	Sum
ycf1-a		1	1	1	1		1	1		1	1	1	9	1
rpl32-trnL		1	1	1			1	1		1	1	1	8	2
trnK		1	1	1	1	1	1				1	1	8	3
rps16-trnQ	1	1	1	1			1			1			6	4
trnSUGA-trnGUCC			1	1	1		1		1		1		6	5
ndhC-trnV		1					1		1	1	1		5	6
ndhF		1		1			1			1	1		5	7
petA-psbJ		1	1		1		1			1			5	8
trnH-psbA			1				1			1	1	1	5	9
ycf1-b		1	1	1			1	1					5	10
rpoB-trnC	1				1		1				1		4	11
accD-psaI			1				1			1			3	12
atpH-atpI					1					1		1	3	13
clpP								1	1			1	3	14
ndhA		1			1					1			3	15
petB-petD		1					1		1				3	16
petN-psbM			1							1		1	3	17
psbE--petL		1					1			1			3	18
psbM-trnD		1								1	1		3	19
rbcL-accD						1	1					1	3	20
trnSGCU-trnGGCC				1			1				1		3	21
trnT-psbD	1		1		1								3	22
trnW-psaJ							1		1			1	3	23

## Sheet: Sheet3
	Table S3. Twenty-four loci of high potentials. The values are nucleotide diversity (π)
		1	2	3	4	5	6	7	8	9	10	11	12
		Acorus	Aethionema	Calycanthus	Chimonanthus	Eucalyptus	Gossypium	Nicotiana	Oenothera	Oryza	Paeonia	Populus	Solanum
1	ccsA-ndhD		0.0384
2	clpP-psbB											0.00889
3	ndhE-ndhG			0.00783			0.02438
4	ndhH-rps15							0.01111				0.01077
5	psbE-psbL									0.00696
6	rpl16 intron		0.03826									0.01681
7	rpoC1											0.00957	0.01273
8	rpoC2									0.00471
9	rps15-ycf1					0.00514
10	rps18-rps20											0.00783
11	rps2-rpoC2					0.00571
12	rps4-trnTUGU			0.00762
13	trnCGCA-petN					0.00609
14	trnEUUC-trnTGGU		0.043
15	trnFGAA-ndhJ					0.005					0.01917
16	trnGGCC-trnRUCU					0.00435
17	trnIGAU-trnAUGC												0.01651
18	trnKUUU-rps16										0.02118
19	trnNGUU-ndhF					0.00875
20	trnRACG-trnNGUU											0.00566
21	trnTUGU-trnLUAA			0.00762
22	ycf2								0.00739	*
23	ycf3-rps4									0.00348
24	ycf4-cemA					0.006						0.00818
